# Supplementary material for: Determination of Zinc, Cadmium, Lead, Copper and Silver Using a Carbon Paste Electrode and a Screen Printed Electrode Modified with Chromium(III) Oxide
Source: PubMed Central journal article supplement (PMC5580028; doi:10.3390/s17081832), 2017-08-09
Supplement: sensors-17-01832-s001.pdf [file sensors-17-01832-s001.pdf]

# Determination of Zinc, Cadmium, Lead, Copper and Silver Using a Carbon Paste Electrode and a Screen Printed Electrode Modified with Chromium(III) Oxide

Zuzana Koudelkova <sup>1</sup>, Tomas Syrový <sup>2,3</sup>, Pavlina Ambrozova <sup>4</sup>, Zdenek Moravec <sup>5</sup>, Lubomir Kubac <sup>3,6</sup>, David Hynek <sup>1,7</sup>, Lukas Richtera <sup>1,7</sup>, Vojtech Adam <sup>1,7,\*</sup>

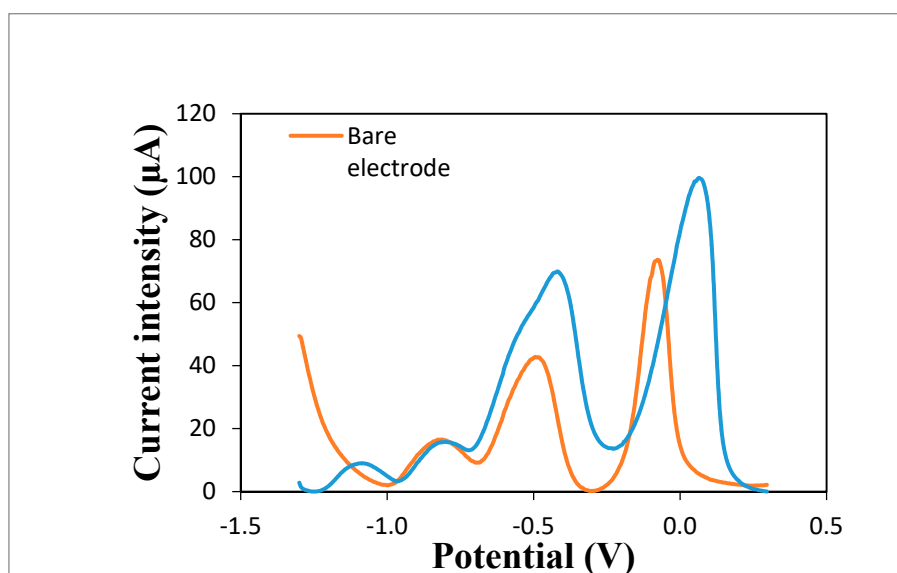

**Figure S1.** Comparison of the influence of the heavy metals detection with the bare electrode compared to the CPE modified with thermally produced  $\text{Cr}_2\text{O}_3$ . The concentration of individual metals was  $800 \mu\text{g}\cdot\text{L}^{-1}$ .

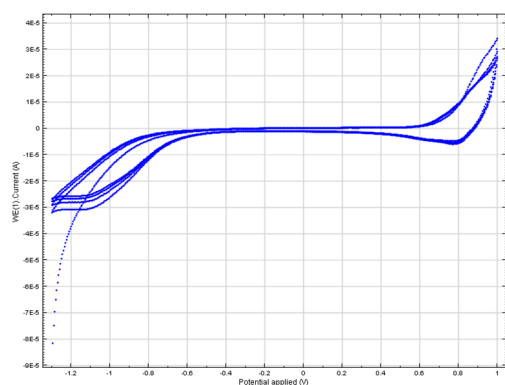

(a)

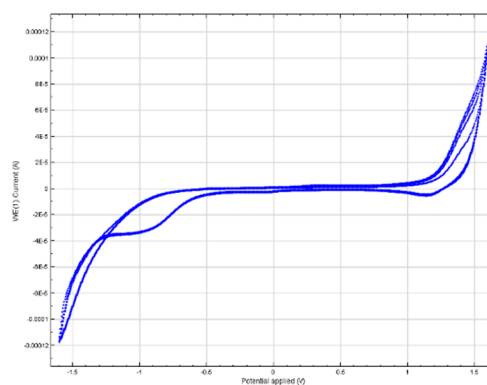

(b)

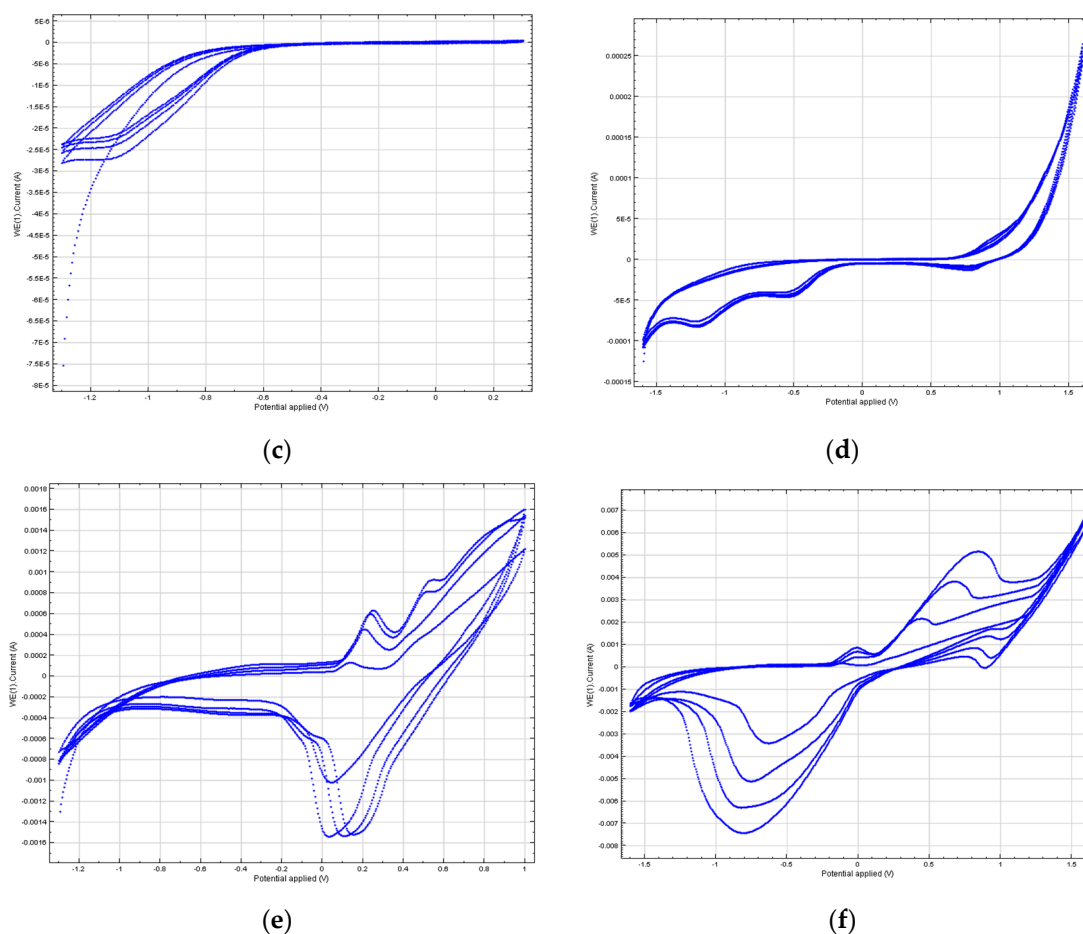

**Figure S2.** Cyclic voltammetry of individual materials. (a) CV for the bare electrode, the range from  $-1.3$  to  $0.3$  V, (b) CV for the bare electrode, the range from  $-1.6$  to  $1.6$  V, (c) CV for the Cr-CPE, the range from  $-1.3$  to  $0.3$  V, (d) CV for the Cr-CPE, the range from  $-1.6$  to  $1.6$  V, (e) CV for the Cr-SPE, the range from  $-1.3$  to  $0.3$  V, (f) CV for the Cr-SPE, the range from  $-1.6$  to  $1.6$  V.

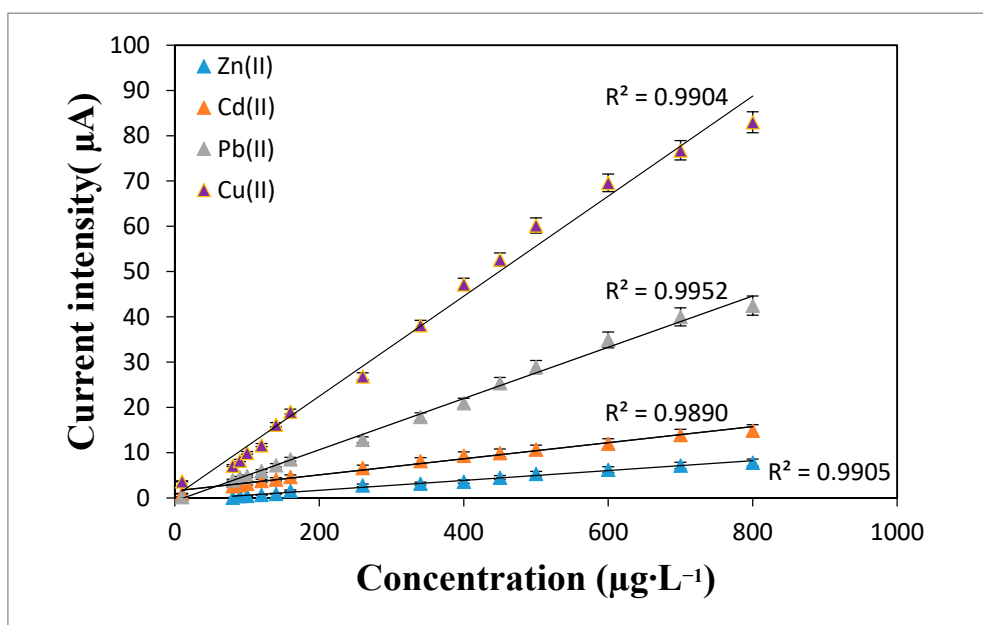

**Figure S3.** The calibration curves for each metals ions Zn(II), Cd(II), Pb(II) and Cu(II), measurement by the Cr-CPE.
